# Supplementary material for: Using Network Theory for Psychoeducation in Eating Disorders
Source: Springer Nature journal article supplement (doi:10.1007/s10608-021-10204-w), 2021-02-26
Supplement: MOESM1 [file 18910150]

**Supplementary Material 1**

General Introduction:

Hello, my name is Dr. Berta Summers. I’m a clinical psychologist at Massachusetts General Hospital. You’ve just learned that you score higher than average on a questionnaire measuring symptoms of eating disorders. This means that you are at risk for developing an eating disorder, or that you might currently meet diagnostic criteria for an eating disorder. The purpose of this video is to provide you with some basic information about eating disorders.

Eating disorders are marked by disordered eating behavior such as extreme dieting or overeating, recurrent thoughts about food or eating, and great appointed significance of weight and shape. Many people who have eating disorder symptoms wonder what causes these kinds of problems.

1. NT Rationale

In fact, these symptoms themselves play an important role for the development and maintenance of eating disorders. Symptoms do not merely accumulate due to the underlying disorder, but instead actively **cause each other**. Other than in primarily somatic illnesses, there is no underlying disorder that leads to all these symptoms. If someone has a brain tumor, it is the brain tumor that leads to dizziness or may bad eyesight. For eating disorders, this does not make sense. It is not the eating disorder that *makes* someone worry about weight and food or cause someone to restrict food intake. Instead, it all starts with specific factors such as perfectionism which can trigger symptoms which again lead to the activation of other symptoms and ultimately results in the full-blown picture of an eating disorder.

For many patients, the great importance of shape and weight is the key feature of their eating pathology. It is because of this great importance they assign to shape and weight that external triggers such as careless comments of others about their appearance may lead to an intensified preoccupation with their weight and shape. This preoccupation may then lead to the fear to put on weight. In order to regulate this fear of weight, many patients then start to restrict their food intake which may lead to binge eating which again leads to guilt which again intensifies the preoccupation with food. As you see, one symptom leads to another and often these symptoms maintain one another – a **network** of symptoms develops. The pattern of the symptom network can differ from individual to individual as symptoms may be differently linked. Whereas one individual may experience intense preoccupation with food to lead to extreme dieting, others may have episodes of overeating. Overall, symptoms develop over time and can cause each other. It is not an invisible eating disorder that causes all these symptoms.

In recent years, psychologists have investigated these **networks of symptoms** and identified symptoms that function as key players, i.e., symptoms that interact with multiple other symptoms. Researchers underline that if these symptoms are targeted in treatment, the eating pathology as a whole, i.e., multiple symptoms, can be reduced.

1. CB Rationale

The truth is, whether or not a person develops an eating disorder depends upon a **wide variety of factors.** For example, there are a number of psychological traits that are linked to the development of eating disorders, such as low self-esteem and extreme perfectionism. Also, people who suffer from eating disorders may inherit genetic traits that leave them predisposed to eating problems. Finally, there are a number of environmental factors associated with the development of eating disorders, such as popular media portrayals of the ideal body shape as being excessively thin. However, despite the factors that may be responsible for eating disorders, we want to provide you with information about several factors that are known to *maintain* eating disorders.

One factor that strongly maintains eating disorders is referred to as the overvaluation of weight and shape. This refers to the tendency of eating disorder sufferers to evaluate themselves almost entirely on the basis of their weight and the appearance of their body. Whereas most people evaluate themselves on the basis of many important life domains, such as career achievements and success in interpersonal relationships, people with eating disorders often judge their self-worth exclusively in terms of their body shape and weight. When people evaluate themselves based solely on their weight and shape, it gives rise to other factors that maintain eating disorders. For example, many sufferers try to greatly restrict their diet and avoid certain foods, which continues to fuel the eating disorder. In addition, many people with eating disorders check their weight excessively as well as studying their body shape in the mirror, and these behaviors reinforce the overvaluation of weight and shape, thereby maintaining the eating disorder.

The factors that maintain eating disorders develop gradually over time, and they eventually develop into a **vicious cycle** that keeps sufferers “trapped” in their eating disorder. Researchers underline that if sufferers learn ways to prevent engagement in these maintaining factors and stop the vicious cycle, the eating pathology can be reduced.

1. BG Rationale

**Genetics** are a large part of what puts a person at risk for developing an eating disorder. For example, immediate family members of a person with an eating disorder have a significantly higher risk of developing an eating disorder than would an average person. In fact, genetic factors explain more than 50% of the risk for developing an eating disorder. This is because genetics play such a large part in determining whether someone develops an eating disorder or not.

Genes are like manufacturing instructions for building our brains and bodies. Genes determine how we look, and what kinds of traits we have. Likewise, certain genes create chemical imbalances in the brain, which are known as major causes of eating disorders. Furthermore, genes determine whether or not people develop eating disorders in response to stressful events. For example, not everybody who gets mistreated as a child develops an eating disorder later in life; it is the person’s genetic makeup that determines whether that person develop an eating disorder in response to the abuse. Our genes can even influence what environments we end up in, so some people may find themselves in high-risk eating disorder situations because of their genes.

In recent years, neuroscience has shown us that eating disorders are truly a **brain disorder**. Brain imaging has shown that there are real differences between the brains of people with eating disorders and the brains of people without an eating disorder. For example, the brains of individuals with eating disorders deviate from brains from individuals without an eating disorder in areas responsible for regulating appetite, mood, and impulse control. In addition, when people with eating disorders become increasingly malnourished, they develop alterations in brain structure and metabolism, which serves to maintain the eating disorder. In recent years, psychologists have investigated possibilities to treat these brain alterations and imbalances in the chemical system. Researchers underline that if these imbalances are targeted in treatment, the eating pathology can be reduced.

**Supplementary Material 2**

**Table S1.**

| Scale | NT *(n = 94)* | CB *(n = 94)* | BG *(n = 102)* |
| --- | --- | --- | --- |
| Baseline illness coherence *M (SD)* | 17.12 (5.83) | 17.11 (5.33) | 16.62 (5.63) |
| Post illness coherence *M (SD)* | 18.15 (5.21) | 17.97 (4.34) | 17.42 (5.12) |
| Change (p value, *d*pp) | <.05, 0.18 | < .05, 0.16 | 0.30, 0.14 |
| Baseline personal control *M (SD)* | 21.73 (5.59) | 21.67 (4.06) | 21.04 (5.22) |
| Post personal control *M (SD)* | 22.62 (5.09) | 22.66 (3.67) | 20.73 (4.74) |
| Change (p value, *d*pp) | < .05, 0.15 | < .01, 0.24 | 0.53, -0.06 |
| Baseline timeline *M (SD)* | 21.83 (5.37) | 21.13 (5.30) | 21.54 (5.26) |
| Post timeline *M (SD)* | 19.45 (5.28) | 19.54 (4.83) | 21.21 (5.14) |
| Change (p value, *d*pp) | < .001, -0.44 | < .001, -0.30 | 0.53, -0.06 |
| Baseline self-blame *M (SD)* | 14.44 (3.44) | 14.57 (3.38) | 14.78 (3.34) |
| Post self-blame *M (SD)* | 12.20 (4.11) | 12.66 (3.50) | 10.91 (4.56) |
| Change (p value, *d*pp) | <.001, -0.64 | < .001, -0.58 | < .001, -1.16 |

*Note.* NT = network theory, CB = cognitive-behavioral, BG = biological-genetic, M = mean, SD = standard deviation, *d*pp = within-group effect sizes pre-post difference.

**Table S2.**

| Scale | NT *(n = 94)*  *M (SD)* | CB *(n = 94)*  *M (SD)* | BG *(n = 102)*  *M (SD)* |
| --- | --- | --- | --- |
| Change in timeline | -2.38 (3.53) | -1.59 (3.36) | -0.33 (4.69) |
| Change in personal control | 0.88 (4.19) | 0.99 (3.22) | -0.31 (5.07) |
| Change in illness coherence | 1.03 (4.10) | 0.86 (3.37) | 0.80 (4.88) |
| Change in self-blame | -2.23 (3.66) | -1.91 (3.08) | -3.87 (4.38) |

*Note.* NT = network theory, CB = cognitive-behavioral, BG = biological-genetic, M = mean, SD = standard deviation.

**Supplementary Material 3 – Influential Observations**

When inspecting boxplots of the outcome measures per condition, we found a number of outliers for changes in illness representation (see Figures F3, F4, F5, F6). Since we do not assume that these outliers were generated by any other process than the remaining data, we refrained from excluding them in our primary analysis. However, we were concerned that some of these outliers served as influential observations, which would threaten the representativeness and generalizability of our results. Thus, we repeated the analysis after excluding outliers, i.e., data points that were outside the range of 1.5 time the interquartile range above and below the upper and lower quartile, respectively. We found that the reported effects were in general more pronounced after excluding outliers. In contrast to the primary analysis, one difference emerged: Participants in the NT condition reported significantly greater changes towards a better illness coherence after watching the video than the CB condition. Specifically, there were three data points in the NT condition that represented negative outliers whereas in the CB and BG condition there were more positive outliers (12 and 10, respectively).

Please find the descriptives for the analysis excluding influential observations in Table S2 and a comparison of analyses with and without outliers in Table S3.

**Table S3.**

| Scale | NT  *M (SD)* | CB  *M (SD)* | BG  *M (SD)* |
| --- | --- | --- | --- |
| Change in timeline | -2.25 (3.30)  n=93 | -1.47 (2.40)  n=86 | -0.28 (2.51)  n=89 |
| Change in personal control | 0.64 (1.65)  n=81 | 0.83 (2.09)  n=88 | -0.15 (2.62)  n=93 |
| Change in illness coherence | 1.41 (3.58)  n=91 | - 1. (1.61)   n=80 | 0.08 (2.28)  n=89 |
| Change in perceived self-blame | -2.13 (3.10)  n=91 | -1.81 (2.91)  n=93 | -3.63 (3.70)  n=98 |
| Rating of warmth of the clinician | 7.82 (0.92)  n=92 | 8.01 (0.78)  n=89 | 7.73 (1.05)  n=100 |
| Rating of competence of the clinician | 7.76 (0.77)  n=90 | 7.74 (0.82)  n=92 | 7.74 (0.87)  n=96 |

*Note.* NT = network theory, CB = cognitive-behavioral, BG = biological-genetic, M = mean, SD = standard deviation.

**Table S4.**

| Scale | t(df)  without outliers | *p* value  without outliers | t(df)  with outliers | *p* value  with outliers |  |
| --- | --- | --- | --- | --- | --- |
| Coherence CB vs. BG | -0.16(257) | .564 | .10(287) | .462 |  |
| Coherence NT vs. BG | 3.34(257) | .001 | .38(287) | .422 |  |
| Coherence NT vs. CB | 3.42(257) | .002 | .28(287) | .864 | * |
| Personal Control CB vs. BG | 3.02(259) | .003 | -2.22(287) | .033 |  |
| Personal Control NT vs. BG | 2.39(259) | .011 | 1.19(287) | .038 |  |
| Personal Control NT vs. CB | -.56(259) | .577 | -.17(287) | .864 |  |
| Timeline CB vs. BG | -2.82(265) | .004 | -2.23(287) | .033 |  |
| Timeline NT vs. BG | -4.78(265) | <.001 | -3.65(287) | <.001 |  |
| Timeline NT vs. CB | -1.88(265) | .09 | -1.39(287) | .495 |  |
| Selfblame CB vs. BG | 3.87(279) | <.001 | 3.64(287) | <.001 |  |
| Selfblame NT vs. BG | 3.16(279) | .003 | 3.04(287) | .003 |  |
| Selfblame NT vs. CB | -.68(279) | .499 | -.58(287) | .562 |  |

*Note.* NT = network theory, CB = cognitive-behavioral, BG = biological-genetic, M = mean, SD = standard deviation.


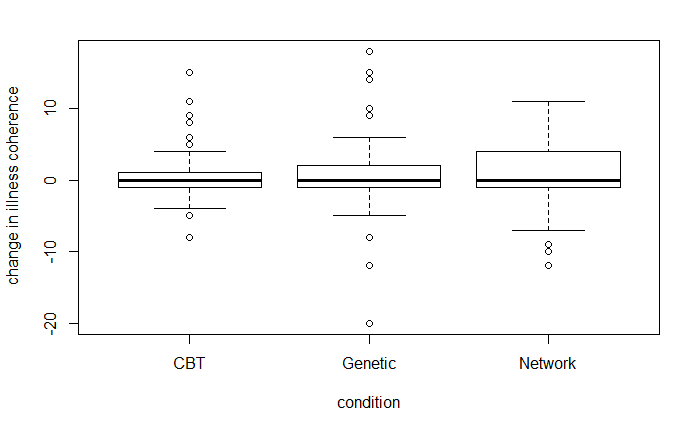


Figure S1. Boxplots of change in illness coherence with whiskers with a maximum of 1.5 interquartile range.

**
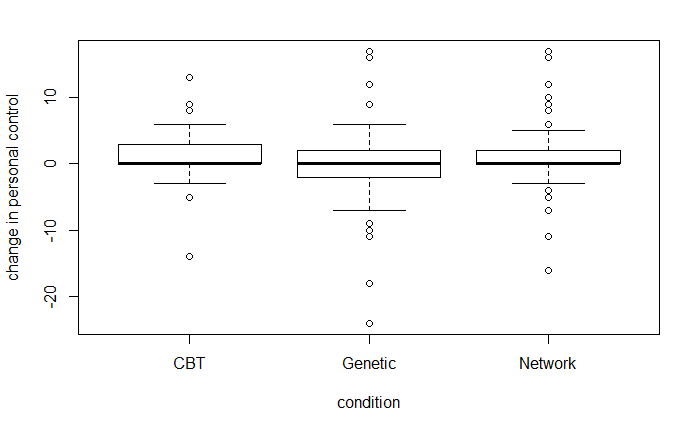
**

Figure S2. Boxplots of change in perceived control with whiskers with a maximum of 1.5 interquartile range.


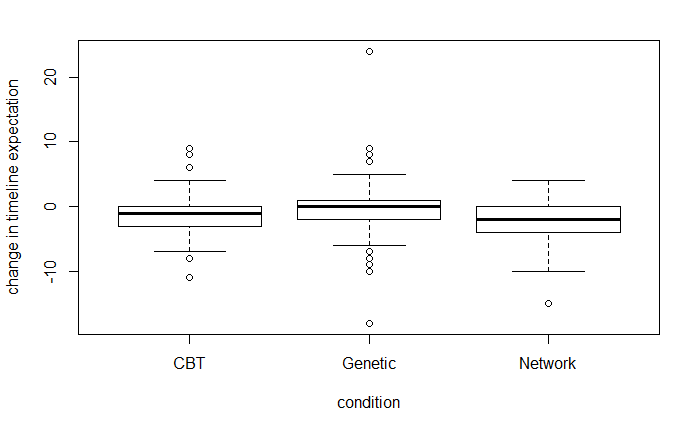


Figure S3. Boxplots of change in prognostic expectation with whiskers with a maximum of 1.5 interquartile range.

**
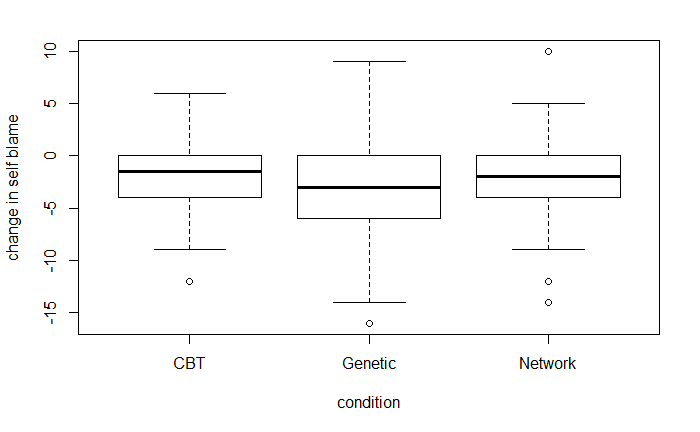
**

Figure S4. Boxplots of change in self-blame with whiskers with a maximum of 1.5 interquartile range.
